# Supplementary material
Source: PubMed Central journal article supplement (PMC1636521)

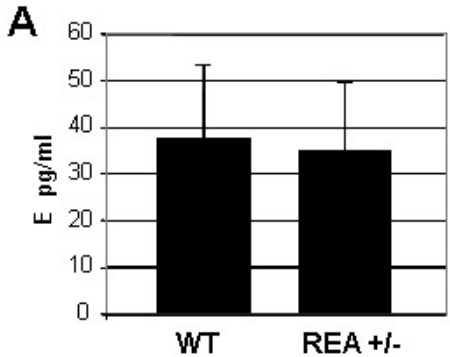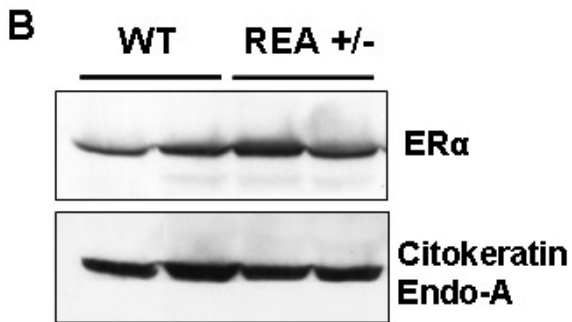

Supplement: pnas_0607768103_1.pdf [file pnas_0607768103_1.pdf]
